# Supplementary material for: DevKidCC allows for robust classification and direct comparisons of kidney organoid datasets
Source: PubMed Central journal article supplement (PMC8862535; doi:10.1186/s13073-022-01023-z), 2022-02-22
Supplement: 13073_2022_1023_MOESM1_ESM.pdf [file 13073_2022_1023_MOESM1_ESM.pdf]

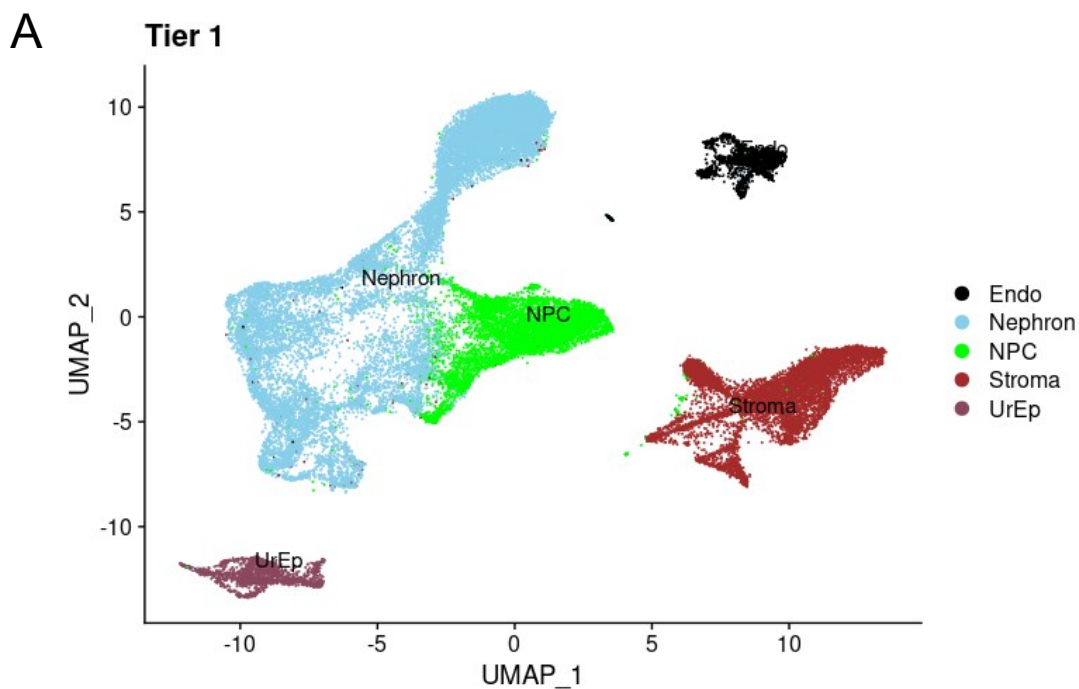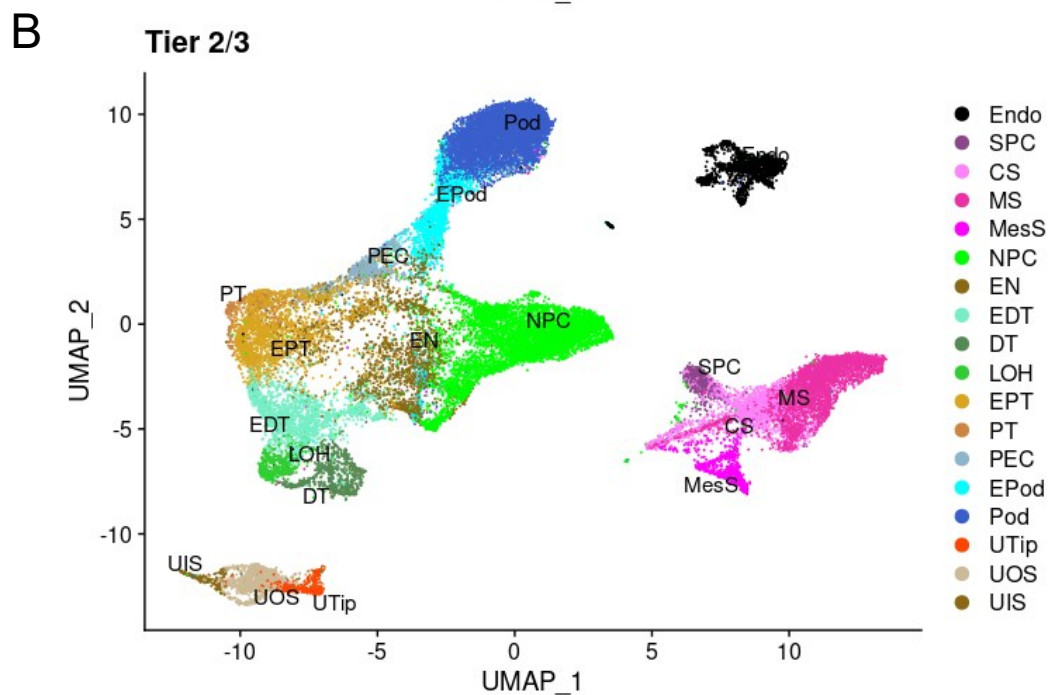

Fig S1: Tier 2 and 3 annotation of human fetal kidney reference

A) UMAP visualisation of the integrated reference HFK datasets annotated by tier 1 identities.

B) UMAP visualisation of the integrated reference HFK datasets annotated by tier 2/3 identities. HFK; human fetal kidney.

A

AUROC

Howden

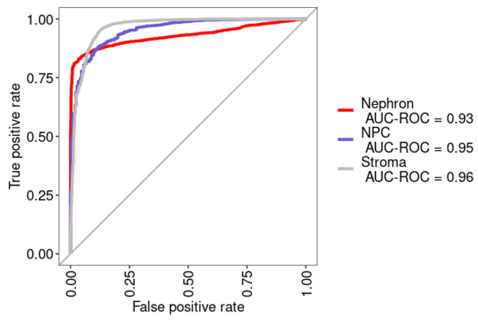

Uchimura

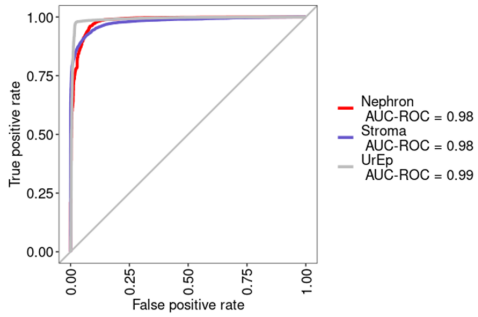

AUPRG

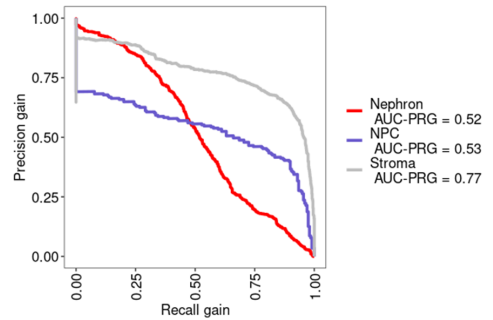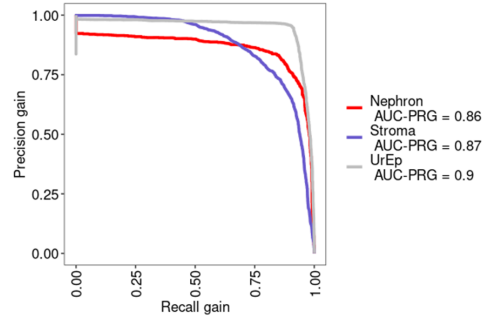

B

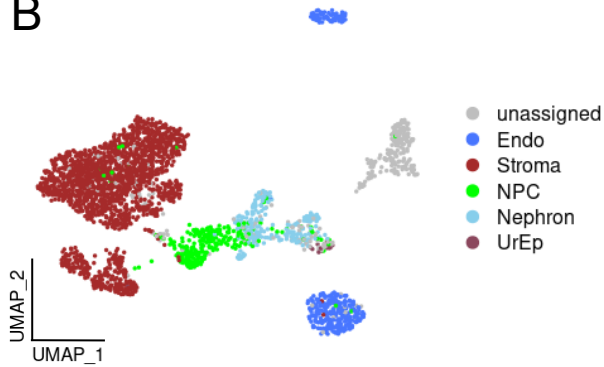

C

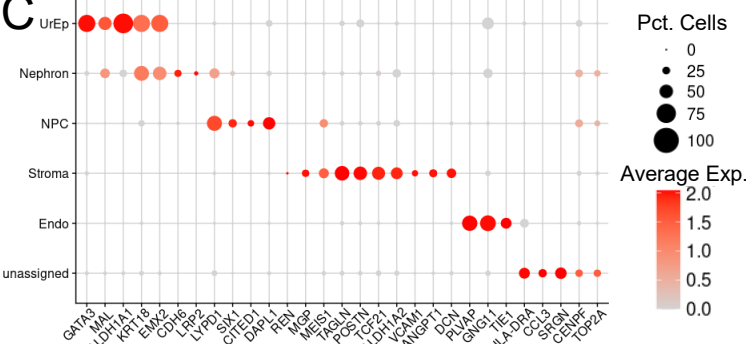

D

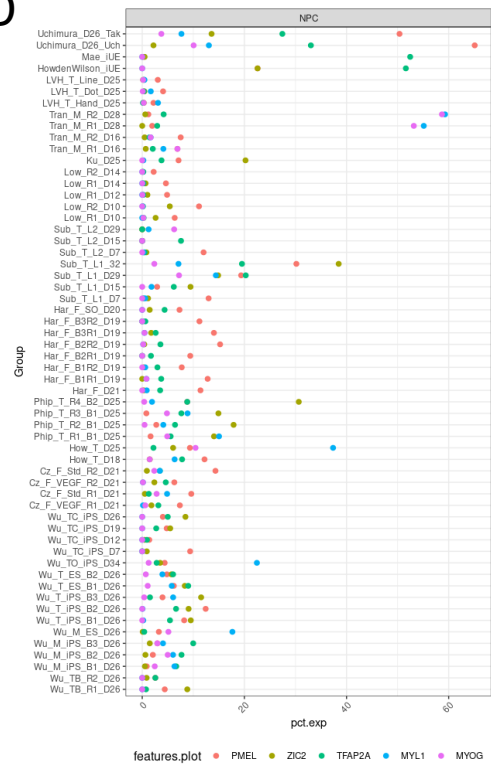

Figure S2: Classifier performance evaluation on organoid samples

A) AUROC and AURPG metrics of binary classifiers as measured on two annotated organoid samples. B) UMAP visualisation of the Tran week 15 HFK dataset grouped by the tier 1 level of classification using DevKidCC. C Expression of marker genes used in Lindstrom to identify cell lineages. D) Percentage of cells per organoid sample expressing notable off-target genes, in the NPC classified population. HFK; human fetal kidney, NPC; Nephron Progenitor Cells.

## Distal Tubule

## Proximal Tubule

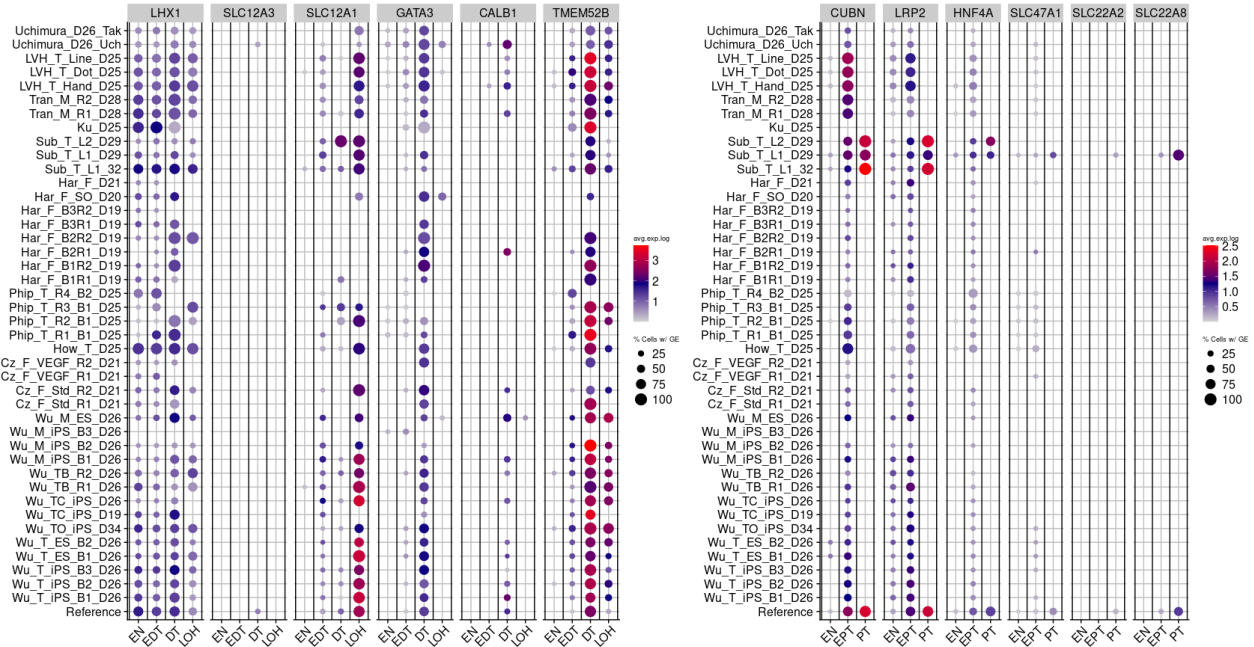

Figure S3: Expression of proximal and distal markers in organoids

A) Expression of key distal markers *LHX1*, *SLC12A3*, *SLC12A1*, *GATA3*, *CALB1* and *TMEM52B* in distal nephron segments across organoids. B) Expression of key proximal markers *CUBN*, *LRP2*, *HNF4A*, *SLC47A1*, *SLC22A2* and *SLC22A8* in proximal nephron segments across organoids

**A**

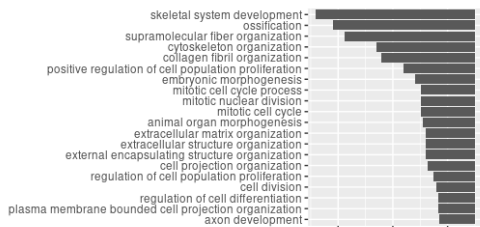

**Takasato**

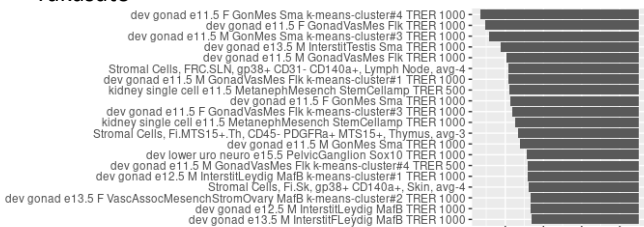

**Morizane**

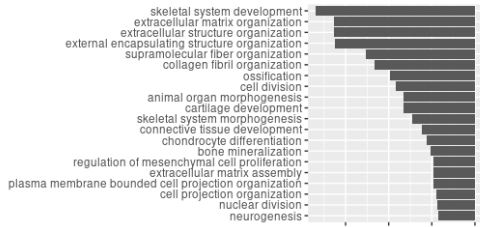

**Freedman**

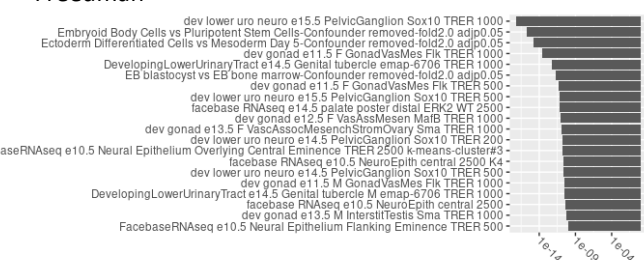

**B**

**Takasato**

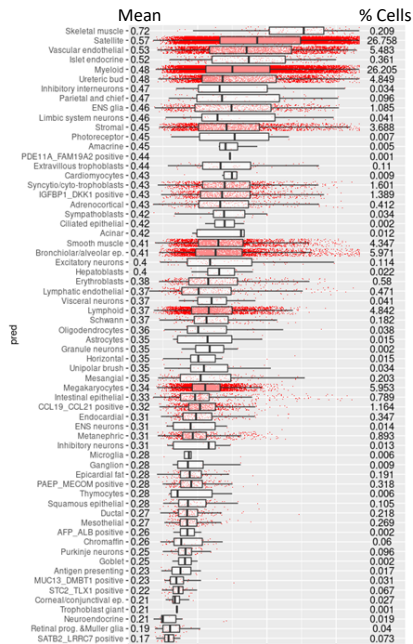

**Morizane**

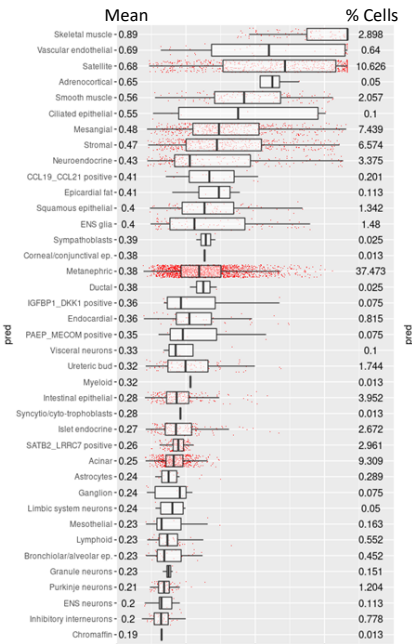

**Freedman**

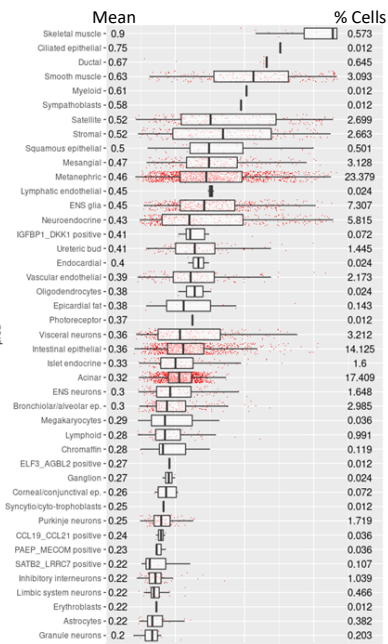

## Figure S4: Expression profiles and classification of unassigned cells

A) The DEGs for all samples grouped by protocol were analysed using ToppFun (<https://toppgene.cchmc.org/enrichment.jsp>) to identify GO terms for biological process (left column) and co-expression atlas (right column) terms. Values are the Bonferroni adjusted p-value. B) The unassigned cells grouped by protocol were analysed using Azimuth (<https://azimuth.hubmapconsortium.org/>) with the Human Fetal Development atlas. Cells were plotted by most probable cell type match within the reference, arranged from the highest probability mean to lowest. Average mean and total % of cells from the query datasets also presented. TRER; top-relative-expression-ranked
